# Supplementary material for: The Effect of Metformin and Carbohydrate-Controlled Diet on DNA Methylation and Gene Expression in the Endometrium of Women with Polycystic Ovary Syndrome
Source: MDPI journal article supplement (doi:10.3390/ijms24076857), 2023-04-06
Supplement: s1 [file s1]

**Table S1.** List of primers used in this study.

|                       | Gene          | Primer sequence (5'-3')                                | Amplicon size (bp) |
|-----------------------|---------------|--------------------------------------------------------|--------------------|
| <b>Analysis</b>       |               |                                                        |                    |
| Relative expression   | <i>HOXA10</i> | F: CTCGCCGGAGAAGGATTC<br>R: TCACTTGTCTGTCCGTGAGG       | 90                 |
|                       | <i>IGFBP1</i> | F: TCCTTTGGGACGCCATCAGTAC<br>R: GATGTCTCCTGTGCCTTGGCTA | 133                |
|                       | <i>ESR1</i>   | F: CACCAACCAGTGCACCATTG<br>R: AAGGTTGGCAGCTCTCATGTC    | 205                |
|                       | <i>ESR2</i>   | F: CCATGATCCTGTCTCAATTCC<br>R: CTCTTGGCAATCACCCAAAC    | 127                |
|                       | <i>PAX6</i>   | F: AACGATAACATAACCAAGCGTGT<br>R: GGTCTGCCCCGTTCAACATC  | 120                |
|                       | <i>IRS1</i>   | F: AGCATCAGTTTCCAGAAGCAG<br>R: GCTGAGGTCATTTAGGTCTTCA  | 84                 |
|                       | <i>GAB1</i>   | F: GGTGGTGAAGTGGTCTGCTC<br>R: GAACCATCTCCTCTTCCATGCA   | 87                 |
|                       | <i>SLC2A4</i> | F: CGAGCAACTTCATCATTGGCAT<br>R: ACCGCAAATAGAAGGAAGACGT | 79                 |
|                       | <i>ACTB</i>   | F: CTTCTGGGCATGGAGTC<br>R: CGTACAGGTCTTTGCGGATG        | 89                 |
|                       | <i>HOXA10</i> | F: CGTCTCCTGGCCCATCAATA<br>R: CCAATCCCGAGCCAGAGTTT     | 132                |
| MeDIP (gene promoter) | <i>IGFBP1</i> | F: GCGCTGCCAATCATTAACCTC<br>R: CAAGTGATGGTGGAGCGGTG    | 169                |
|                       | <i>ESR1</i>   | F: CTCGGGCTGTGCTCTTTTTC<br>R: GTGTGGAGGGTCATGGTCAT     | 113                |
|                       | <i>ESR2</i>   | F: TCTGTGCGCCACTATCCTTG<br>R: AGAGGGGAGTAGTGCCTGAG     | 141                |
|                       | <i>PAX6</i>   | F: TATTTTGTGTGAGAGCGAGCGG<br>R: CTGAACCAGAGCGGGAAATGA  | 108                |

|                |                                                      |     |
|----------------|------------------------------------------------------|-----|
| <i>GAB1</i>    | F: GCTCGCGTTCTGTTCAAGTT<br>R: AACCTAGCTCTCCTGGTCGC   | 119 |
| <i>IRS1</i>    | F: CCTCCAGCCCTGTTTGCATG<br>R: CACGTCCGAGAAGCCATCG    | 147 |
| <i>SLC2A4</i>  | F: TCAGAGACTCCAGGATCGGTT<br>R: CGGAGCCTATCTGTTGGAAGC | 97  |
| <i>LINE-1*</i> | F: TTCCCTTTCCGAGTCAAAGA<br>R: CAATATTCGGGTGGGAGAGA   | 71  |
| <i>H19*</i>    | F: GAGCCGCACCAGATCTTCAG<br>R: TGATCACAGTGTGTTCCACCAA | 134 |
| <i>GAPDH</i>   | F: CCTTCCCCTAGTCCCCAGAAAC<br>R: GCTCCTCTGCGACACGT    | 122 |

---

\*Used as controls of global methylation (*LINE-1*, repeated sequence; *H19*, imprinted gene).
